# Supplementary material for: Tuning the gas phase redox properties of copper(ii) ternary complexes of terpyridines to control the formation of nucleobase radical cations
Source: Royal Society of Chemistry journal article supplement (doi:10.1039/b609688c), 2006-01-01

**Supplementary material for Dalton Transactions manuscript:**

**Tuning the Gas Phase Redox Properties of Copper(II) Ternary Complexes of Terpyridines to Control the Formation of Nucleobase Radical Cations.<sup>‡</sup>**

*Adrian K.Y. Lam, Brendan F. Abrahams, Martin J. Grannas, W. David McFadyen\*, and Richard A. J. O'Hair\**

**List of material:**

**Figure S1:** Space filling representation of (6,6"-Dibromo-2',2:6',2"-terpyridine)bis(nitrato)copper(II) monohydrate viewed without the coordinated nitrate anions.

**Figure S2:** Space filling representation of (6,6"-Dibromo-2',2:6',2"-terpyridine)bis(nitrato)copper(II) monohydrate viewed with the coordinated nitrate anions included.

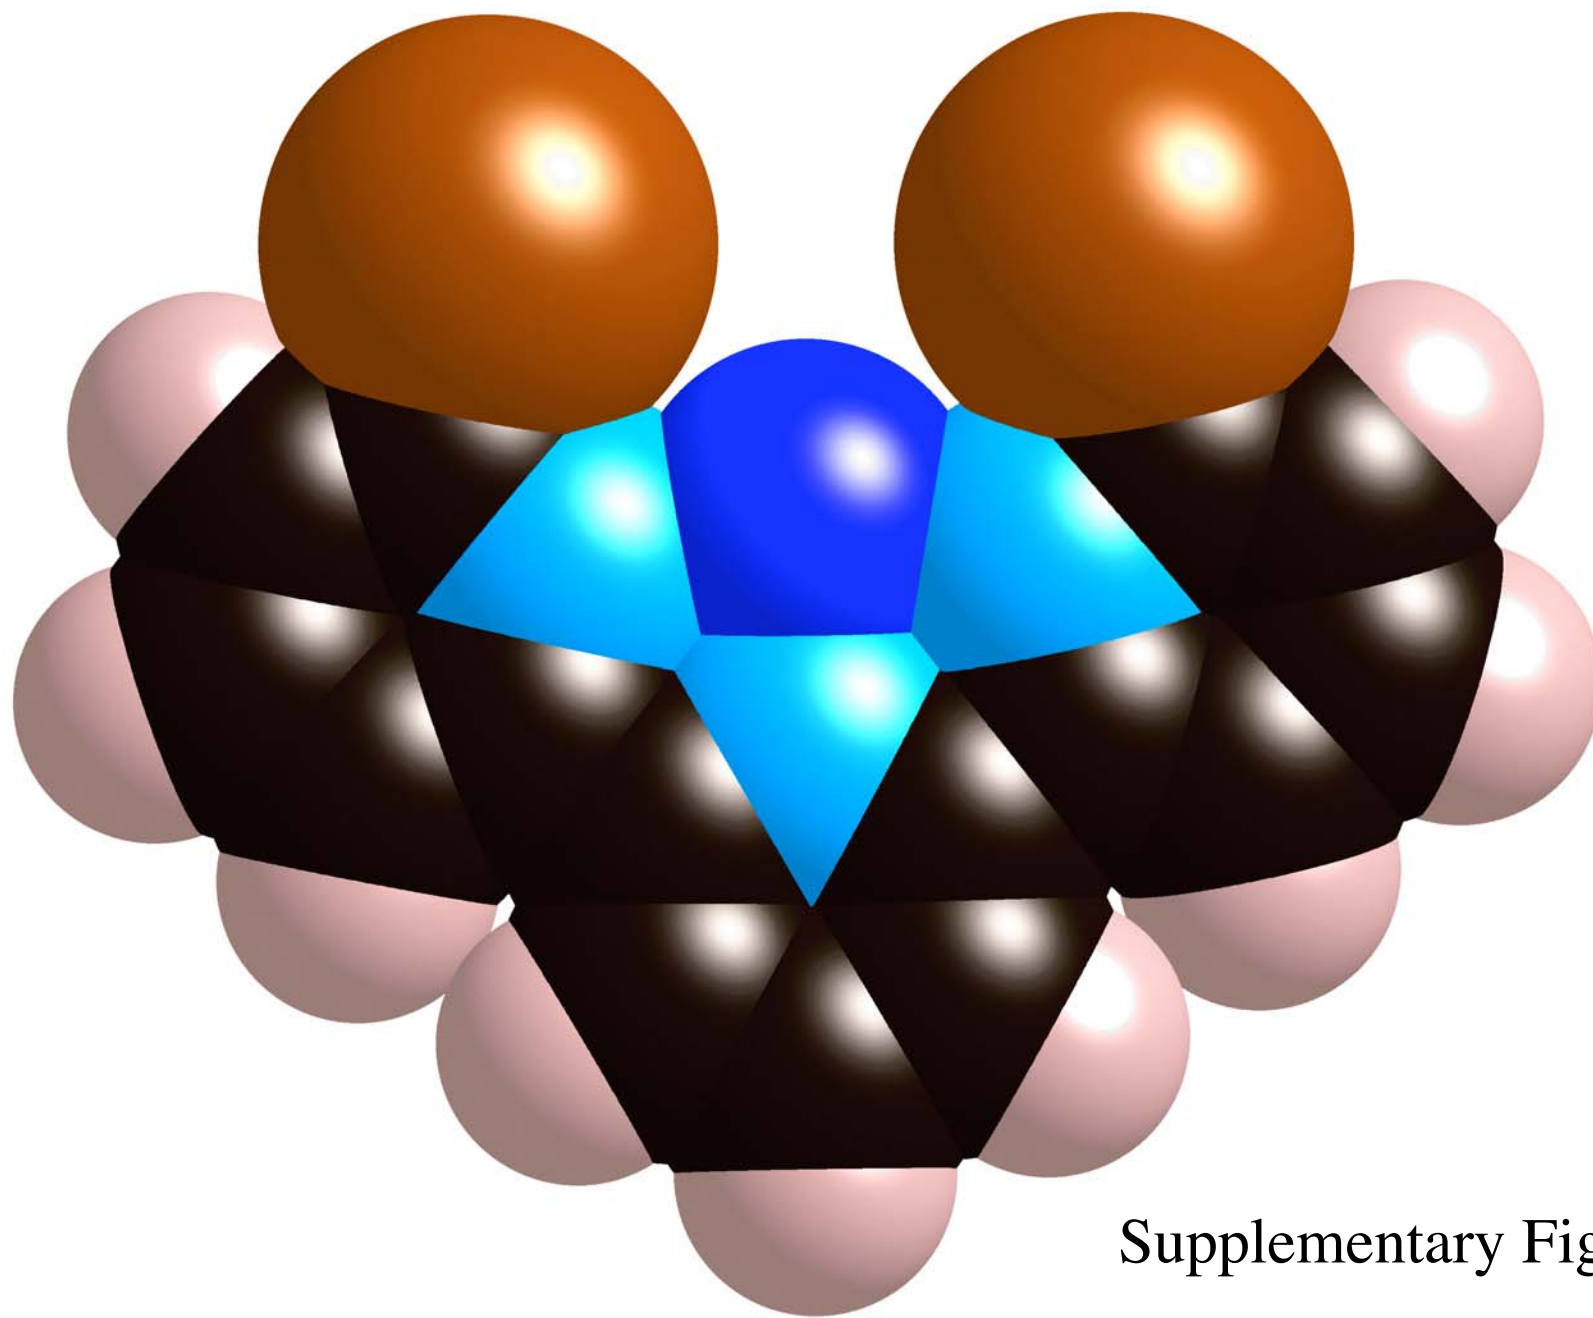

Supplementary Figure S1

Supplementary Figure S2

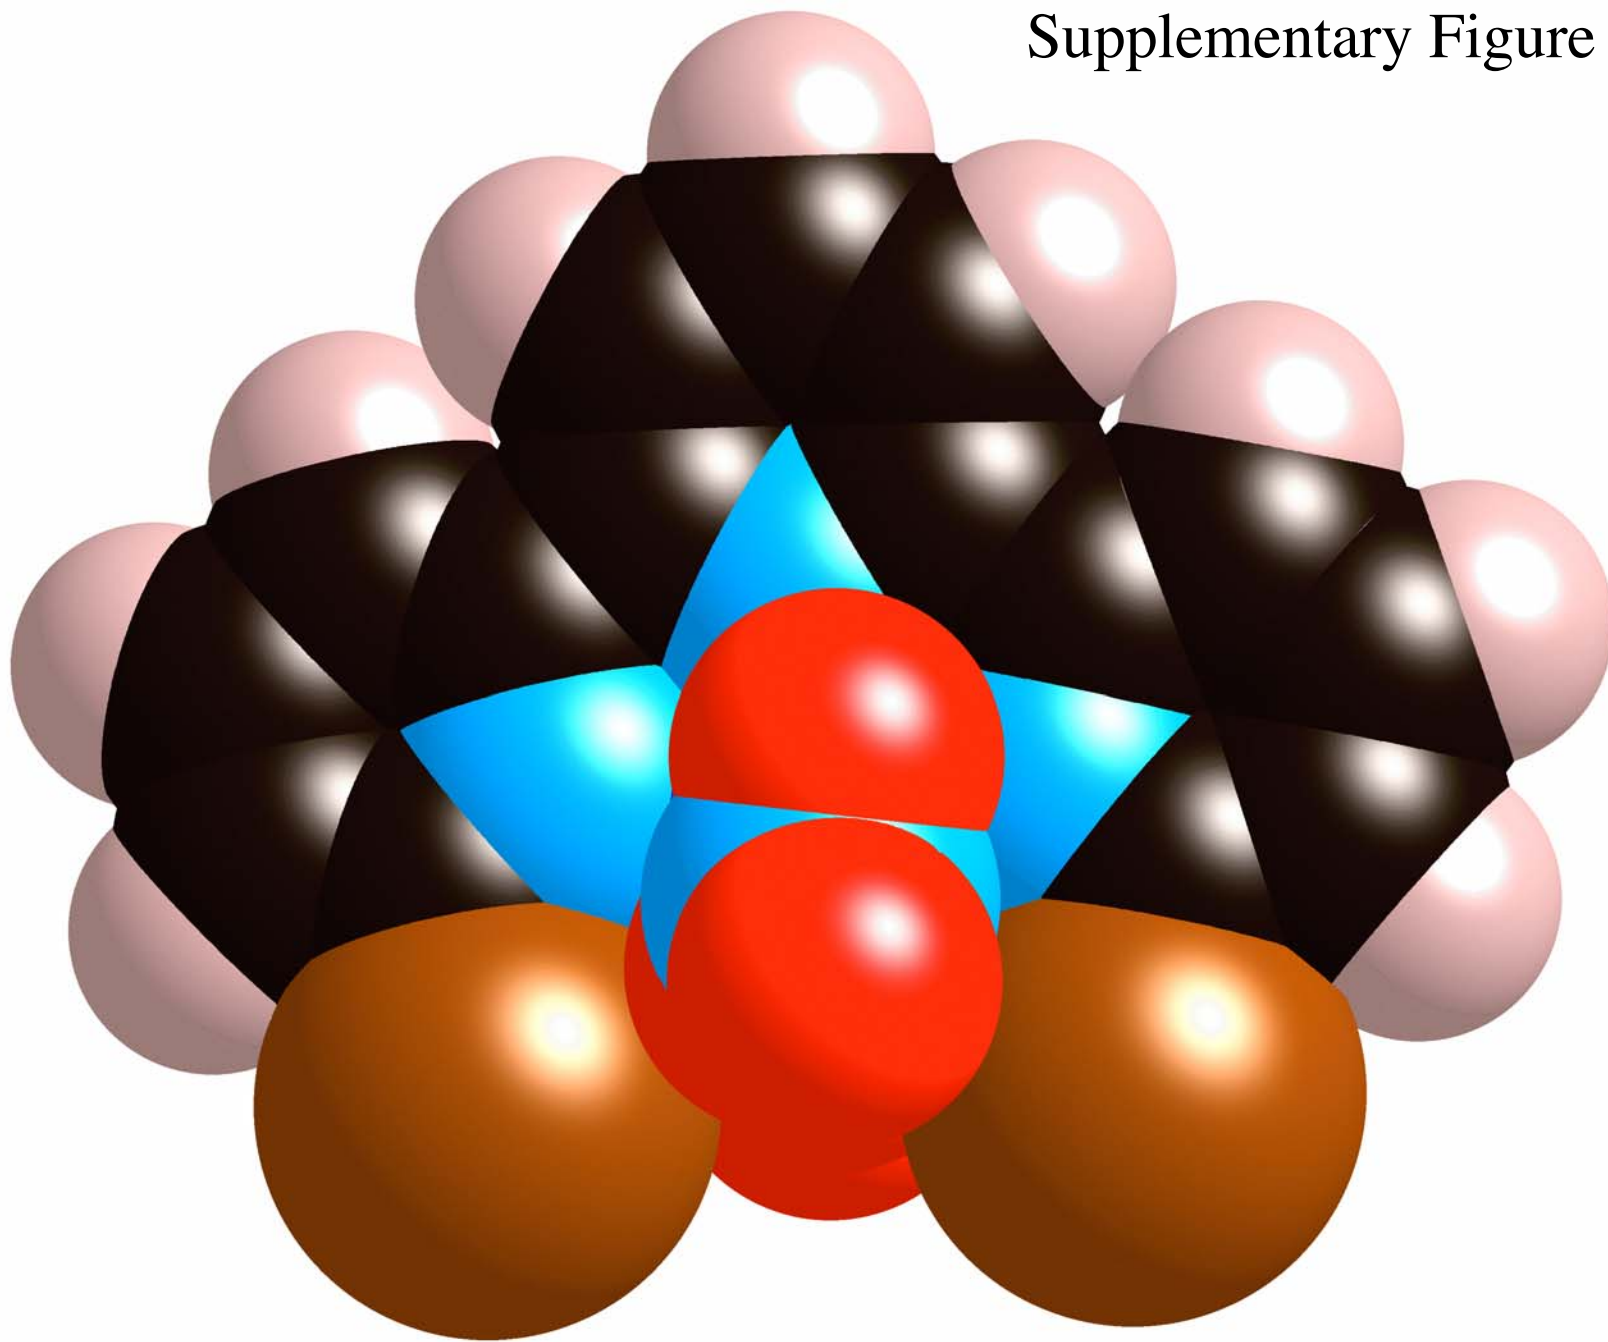

Supplement: b609688c.pdf [file b609688c.pdf]
